# Supplementary material for: GAG-DB, the New Interface of the Three-Dimensional Landscape of Glycosaminoglycans
Source: PubMed Central journal article supplement (PMC7763844; doi:10.3390/biom10121660), 2020-12-11
Supplement: biomolecules-10-01660-s001.pdf [file biomolecules-10-01660-s001.pdf]

## Supplementary Figures

2GD4

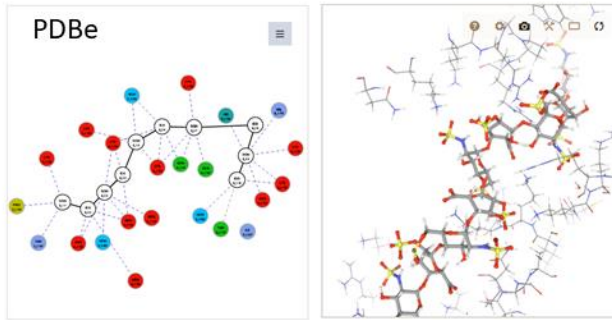

SWISS-MODEL

Ligands

ZDO: 14 residues within 4Å  
 IDS: 9 PLIP interactions  
 SUS: 9 interactions with SGN.2 chain C  
 Hydrogen bonds:  
 C:N 56, C:T 55,  
 C:T 55, C:N 56,  
 C:K 136, C:P 23,  
 C:N 56, C:K 125,  
 C:R 57, C:R 58,  
 C:S 123,  
 C:E 124,  
 C:K 125  
 Water bridges:  
 C:K 136,  
 C:E 124  
 Salt bridges:  
 C:K 136, C:R 58,  
 C:K 125,  
 C:R 140,  
 C:K 125,  
 C:K 125,  
 C:K 136, C:R 24

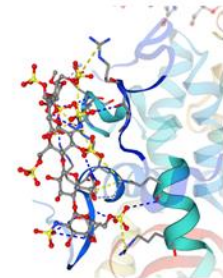

Composite ligand consists of ZDO:F.1, IDS:F.2, SUS:F.3, BDP:F.4, SGN:F.5.  
 Interacting chains: 1

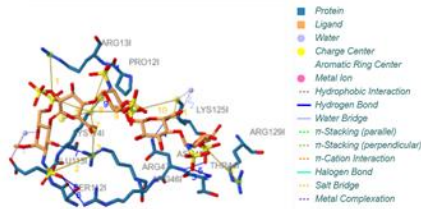

PLIP

LIGPLOT of interactions involving ligand SGN-IDS-SGN-IDS-SGN

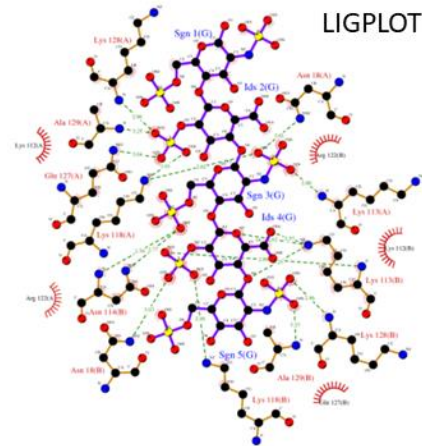

LIGPLOT

Download visualization in PyMol (Lack) format | es | en | img

Hydrogen Bonds

| Index | Residue | AA  | Distance H-A | Distance D-A | Donor Angle | Protein-donor? | Sidechain | Donor Atom | Acceptor Atom |
|-------|---------|-----|--------------|--------------|-------------|----------------|-----------|------------|---------------|
| 1     | 121     | PRO | 2.30         | 2.67         | 101.82      | ✓              | ✓         | 10600 [O3] | 2233 [O2]     |
| 2     | 441     | THR | 3.02         | 4.00         | 170.82      | ✓              | ✓         | 2390 [N4]  | 10954 [O3]    |
| 3     | 441     | THR | 2.99         | 3.00         | 122.04      | ✓              | ✓         | 10954 [O3] | 2390 [O2]     |

Salt Bridges

| Index | Residue | AA  | Distance | Protein positive? | Ligand Group | Ligand Atoms                      |
|-------|---------|-----|----------|-------------------|--------------|-----------------------------------|
| 1     | 131     | ARG | 5.37     | ✓                 | Sulfate      | 10696, 10686                      |
| 2     | 471     | ARG | 4.95     | ✓                 | Sulfonamide  | 10678, 10678, 10679, 10680, 10681 |

Water Bridges

| Index | Residue | AA | Dist. A-W | Dist. D-W | Donor Angle | Water Angle | Protein-donor? | Donor Atom | Acceptor Atom | Water Atom |
|-------|---------|----|-----------|-----------|-------------|-------------|----------------|------------|---------------|------------|
|-------|---------|----|-----------|-----------|-------------|-------------|----------------|------------|---------------|------------|

**Figure S1.** Detailed of the analysis of GAG binding in crystal structure of a ternary FG1-FGFR2-Heparin complex (PDB 2GD4) available from different sources ; PDBe ; Swiss-Model ; PLIP, LIGPOLY.

1f0o

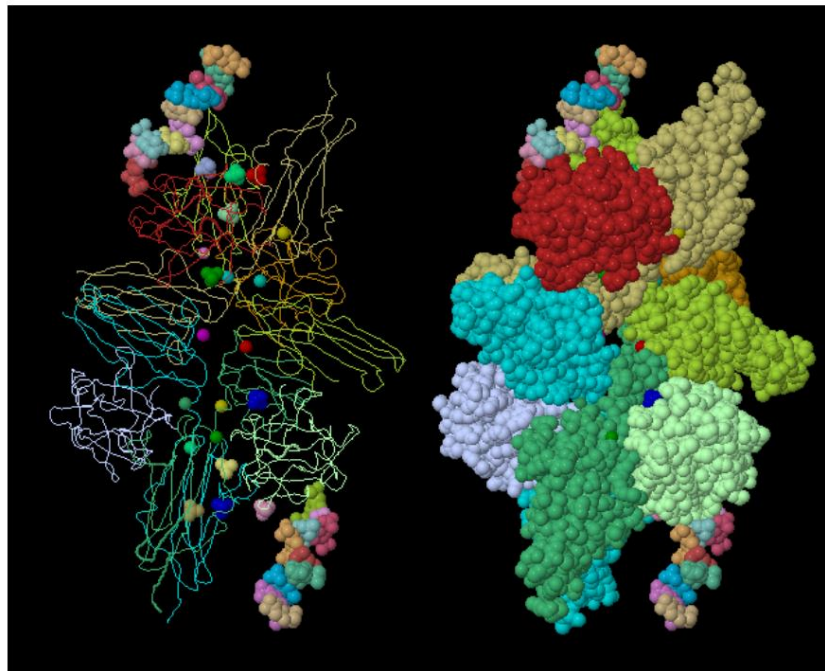

**Figure S2.** Quaternary organisation in the crystal Structure of the Antithrombin-S195A Factor Xa-Pentasaccharide Complex (PDB 1EO0) computed and displayed by PISA.
